# Supplementary material for: Mediating role of psychological distress and domestic violence in the association of fear of COVID-19 with marital satisfaction and sexual quality of life among women of reproductive age: An Iranian cross-sectional study
Source: HighWire-hosted journal article supplement (doi:10.1136/bmjopen-2022-068916), 2023-02-01
Supplement: bmjopen-2022-068916supp001_data_supplement.pdf [file bmjopen-2022-068916supp001_data_supplement.pdf]

**Demographic Characteristics Questionnaire**

1) Age: ..... years

2) Spouse age: ..... years

3) Duration of married life: ..... years

4) What is your education level?

Under diploma          Diploma          Academic education

5) What is your spouse's education level?

Under diploma          Diploma          Academic education

6) What is your spouse's job status?

Unemployed          Employed          Retired

7) What is your job?

Housekeeper          Employed

8) How would you assess the financial situation of your family?

Weak          Moderate          Average          Good

9) Independent bedroom:

Yes          No

10) Living conditions:

Independent          With your family or spouse family

11) Frequency of sexual intercourse during the month .....

12) Number of pregnancies .....

13) Number of living children .....

14) Method of delivery .....

15) Method of contraception .....

16) How is your condition in terms of Covid-19?

Infected and recovered          Infected and under treatment

Suspected          Non-infected

| <b>ENRICH Marital Satisfaction Questionnaire</b> |                                                                                                       |                       |              |                                   |                 |                            |
|--------------------------------------------------|-------------------------------------------------------------------------------------------------------|-----------------------|--------------|-----------------------------------|-----------------|----------------------------|
|                                                  |                                                                                                       | <b>Strongly agree</b> | <b>Agree</b> | <b>Neither agree nor disagree</b> | <b>Disagree</b> | <b>completely disagree</b> |
| <b>1</b>                                         | My wife and I fully understand each other.                                                            |                       |              |                                   |                 |                            |
| <b>2</b>                                         | My wife understands my mood and adapts to it                                                          |                       |              |                                   |                 |                            |
| <b>3</b>                                         | I have never regretted my relationship with my wife even for a moment.                                |                       |              |                                   |                 |                            |
| <b>4</b>                                         | I am not satisfied with my wife's personality traits and habits.                                      |                       |              |                                   |                 |                            |
| <b>5</b>                                         | We are happy that we are fulfilling our responsibilities well in our life together.                   |                       |              |                                   |                 |                            |
| <b>6</b>                                         | My relationship with my wife is not satisfactory and I feel she does not understand me.               |                       |              |                                   |                 |                            |
| <b>7</b>                                         | I am very pleased with the way decisions are made about how to resolve disputes.                      |                       |              |                                   |                 |                            |
| <b>8</b>                                         | I am not satisfied with the economic situation of the family and the way decisions are made about it. |                       |              |                                   |                 |                            |
| <b>9</b>                                         | I am very happy with the way I plan to spend my free time and leisure time with my wife.              |                       |              |                                   |                 |                            |
| <b>10</b>                                        | I am very pleased with the way I express my love and feelings and have sex with my wife.              |                       |              |                                   |                 |                            |
| <b>11</b>                                        | I am not satisfied with the way I and my wife play the role and responsibility as "parents".          |                       |              |                                   |                 |                            |
| <b>12</b>                                        | Sometimes my wife is not trustworthy and always follows her own policy.                               |                       |              |                                   |                 |                            |
| <b>13</b>                                        | My wife sometimes says things that cause humiliation.                                                 |                       |              |                                   |                 |                            |
| <b>14</b>                                        | When discussing problems with my spouse, I often feel that he or she does not understand me.          |                       |              |                                   |                 |                            |
| <b>15</b>                                        | We have trouble making financial decisions.                                                           |                       |              |                                   |                 |                            |
| <b>16</b>                                        | It bothers me that I cannot spend money without my wife's permission.                                 |                       |              |                                   |                 |                            |

| <b>ENRICH Marital Satisfaction Questionnaire</b> |                                                                                               |                       |              |                                   |                 |                            |
|--------------------------------------------------|-----------------------------------------------------------------------------------------------|-----------------------|--------------|-----------------------------------|-----------------|----------------------------|
|                                                  |                                                                                               | <b>Strongly agree</b> | <b>Agree</b> | <b>Neither agree nor disagree</b> | <b>Disagree</b> | <b>completely disagree</b> |
| <b>17</b>                                        | I will not be happy until my wife is with me.                                                 |                       |              |                                   |                 |                            |
| <b>18</b>                                        | I'm upset that my spouse is unfairly accepting or rejecting intimacy.                         |                       |              |                                   |                 |                            |
| <b>19</b>                                        | Disagreement over how far we should go to our children has become a problem for us.           |                       |              |                                   |                 |                            |
| <b>20</b>                                        | I feel that our parents create problems in our married life.                                  |                       |              |                                   |                 |                            |
| <b>21</b>                                        | My wife and I disagree on how to practice our religious beliefs.                              |                       |              |                                   |                 |                            |
| <b>22</b>                                        | Sometimes my wife is very stubborn.                                                           |                       |              |                                   |                 |                            |
| <b>23</b>                                        | Sometimes I'm afraid to ask my spouse for help.                                               |                       |              |                                   |                 |                            |
| <b>24</b>                                        | Sometimes we have serious arguments about minor issues.                                       |                       |              |                                   |                 |                            |
| <b>25</b>                                        | I am very satisfied with the way decisions are made about our savings.                        |                       |              |                                   |                 |                            |
| <b>26</b>                                        | My wife and I seem to be equally interested in parties and social activities.                 |                       |              |                                   |                 |                            |
| <b>27</b>                                        | I am satisfied with the amount of love and affection (before intimacy) by my wife.            |                       |              |                                   |                 |                            |
| <b>28</b>                                        | My wife and I agree on how to control our children's behavior.                                |                       |              |                                   |                 |                            |
| <b>29</b>                                        | We spend enough time with our relatives and friends.                                          |                       |              |                                   |                 |                            |
| <b>30</b>                                        | I believe that we have a difference of opinion in our married life.                           |                       |              |                                   |                 |                            |
| <b>31</b>                                        | My wife's being late for home bothers me.                                                     |                       |              |                                   |                 |                            |
| <b>32</b>                                        | I wish my wife was more willing to share her feelings with me.                                |                       |              |                                   |                 |                            |
| <b>33</b>                                        | I do everything I can to avoid my wife's quarrels.                                            |                       |              |                                   |                 |                            |
| <b>34</b>                                        | My wife and I both know the main evils and as a result they are not a serious problem for us. |                       |              |                                   |                 |                            |

| ENRICH Marital Satisfaction Questionnaire |                                                                                               |                |       |                            |          |                     |
|-------------------------------------------|-----------------------------------------------------------------------------------------------|----------------|-------|----------------------------|----------|---------------------|
|                                           |                                                                                               | Strongly agree | Agree | Neither agree nor disagree | Disagree | completely disagree |
| 35                                        | I do not think my wife has enough time or energy to have fun and spend her free time with me. |                |       |                            |          |                     |
| 36                                        | We are looking for ways to make our sex life more interesting and enjoyable.                  |                |       |                            |          |                     |
| 37                                        | Children seem to be the main cause of problems in our relationships.                          |                |       |                            |          |                     |
| 38                                        | I do not enjoy spending time with some of my wife's relatives.                                |                |       |                            |          |                     |
| 39                                        | My wife and I do not agree with some of our religious teachings.                              |                |       |                            |          |                     |
| 40                                        | Sometimes my wife is very tyrannical.                                                         |                |       |                            |          |                     |
| 41                                        | Sometimes I believe that everything my wife says is difficult for me.                         |                |       |                            |          |                     |
| 42                                        | Sometimes I think that the quarrels between me and my wife continue and will not end.         |                |       |                            |          |                     |
| 43                                        | I'm worried that my wife does not have enough personal interests and hobbies.                 |                |       |                            |          |                     |
| 44                                        | I feel completely comfortable talking to my wife about sex.                                   |                |       |                            |          |                     |
| 45                                        | We have seldom had the opportunity to be together as a couple since we had children.          |                |       |                            |          |                     |
| 46                                        | My wife spends a lot of time with friends and relatives.                                      |                |       |                            |          |                     |
| 47                                        | My wife and I feel limited because of our religious beliefs.                                  |                |       |                            |          |                     |

| Sexual Quality of Life Questionnaire |                                                                                       |                  |       |                |                   |          |                     |
|--------------------------------------|---------------------------------------------------------------------------------------|------------------|-------|----------------|-------------------|----------|---------------------|
|                                      |                                                                                       | Completely Agree | Agree | Somewhat Agree | Somewhat Disagree | Disagree | Completely Disagree |
| 1                                    | When I think about my sex life, I find it an enjoyable part of my whole life.         |                  |       |                |                   |          |                     |
| 2                                    | When I think about my sex life, I feel frustrated and frustrated                      |                  |       |                |                   |          |                     |
| 3                                    | I feel depressed when I think about my sex life                                       |                  |       |                |                   |          |                     |
| 4                                    | When I think about my sex life, I feel that I was not the size of a woman.            |                  |       |                |                   |          |                     |
| 5                                    | I feel good about myself                                                              |                  |       |                |                   |          |                     |
| 6                                    | when I think about my sex life<br>As a sexual partner, I have lost my self-confidence |                  |       |                |                   |          |                     |
| 7                                    | I feel anxious when I think about my sex life                                         |                  |       |                |                   |          |                     |
| 8                                    | I feel angry when I think about my sex life                                           |                  |       |                |                   |          |                     |
| 9                                    | When I think about my sex life, I feel close and intimate with my spouse.             |                  |       |                |                   |          |                     |
| 10                                   | I'm worried about the future of my sex life                                           |                  |       |                |                   |          |                     |
| 11                                   | I have lost the pleasure of sexual activity                                           |                  |       |                |                   |          |                     |
| 12                                   | I feel embarrassed when I think about my sex life.                                    |                  |       |                |                   |          |                     |
| 13                                   | When I think about my sex life, I feel like I can talk to my wife about sex.          |                  |       |                |                   |          |                     |
| 14                                   | I try to avoid sexual activity                                                        |                  |       |                |                   |          |                     |

| <b>Sexual Quality of Life Questionnaire</b> |                                                                                                 |                         |              |                       |                          |                 |                            |
|---------------------------------------------|-------------------------------------------------------------------------------------------------|-------------------------|--------------|-----------------------|--------------------------|-----------------|----------------------------|
|                                             |                                                                                                 | <b>Completely Agree</b> | <b>Agree</b> | <b>Somewhat Agree</b> | <b>Somewhat Disagree</b> | <b>Disagree</b> | <b>Completely Disagree</b> |
| 15                                          | I feel guilty when I think about my sex life                                                    |                         |              |                       |                          |                 |                            |
| 16                                          | When I think about my sex life, I worry that my spouse will feel harassed or estranged from me. |                         |              |                       |                          |                 |                            |
| 17                                          | When I think about my sex life, I feel like I have lost something.                              |                         |              |                       |                          |                 |                            |
| 18                                          | When I think about my sex life, I am satisfied with the number of times I have had sex          |                         |              |                       |                          |                 |                            |

### Hospital Depression and Anxiety Scale (HADS)

**1) Have you had any stress in the last week?**

Never                      Sometimes                      Often                      Most of the time

**2) Do you still enjoy things you used to?**

Absolutely                      Very low                      Not as much as before                      Absolutely as before

**3) Do you feel worried about the possibility of something bad happening to you?**

Not at all                      a little but I do not worry                      Yes but not much                      Yes 100% and very bad

**4) Can you just laugh and see the fun part?**

not at all                      yes but very little                      yes but less than before                      yes exactly like before

**5) Do worrying thoughts cross your mind?**

Sometimes (very low)                      sometimes                      most of the time                      almost always (but not always)

**6) Do you feel cheerful?**

Most of the time                      Sometimes                      Rarely                      Not at all

**7) Can you sit comfortably and feel comfortable?**

Absolutely                      Rarely                      Often                      Yes 100%

**8) Do you feel that your condition is getting worse day by day?**

Basically                      Sometimes                      Usually                      Always

**9) Do you feel fear or something like anxiety?**

Yes, Almost always                      Usually                      Sometimes                      Not at all

**10) Are you less interested in maintaining your appearance?**

Not at all                      Some                      Compared to before yes                      Yes 100%

**11) Do you feel uncomfortable and restless?**

Not at all                      Not too much                      Too much                      Yes 100%

**12) Do you deal with the things around you and everyday events with a good feeling (pleasure)?**

Not at all                      Yes, but definitely less than before                      Yes, but less than before                      Yes, just like always

**13) Do you suddenly feel scared?**

Basically                      Yes very little                      Yes, most of the time                      Yes, almost always

**14) Do you still enjoy reading a good book or radio and television programs?**

Yes, very rare                      Yes, very low                      Yes, sometimes                      Yes, often

| <b>HITS Domestic Violence Screening Questionnaire</b> |                                                                                        |              |               |                  |                        |             |
|-------------------------------------------------------|----------------------------------------------------------------------------------------|--------------|---------------|------------------|------------------------|-------------|
|                                                       |                                                                                        | <b>Never</b> | <b>Rarely</b> | <b>Sometimes</b> | <b>Relatively high</b> | <b>High</b> |
| <b>1</b>                                              | <b>How many times in the last 12 months has your spouse physically harmed you?</b>     |              |               |                  |                        |             |
| <b>2</b>                                              | <b>How many times in the last 12 months has he insulted or slandered you?</b>          |              |               |                  |                        |             |
| <b>3</b>                                              | <b>How many times in the last 12 months have you been threatened with bodily harm?</b> |              |               |                  |                        |             |
| <b>4</b>                                              | <b>How many times have you shouted or cursed in the last 12 months?</b>                |              |               |                  |                        |             |

| <b>Fear of COVID-19 Scale</b> |                                                                                                    |                          |                 |                                   |              |                       |
|-------------------------------|----------------------------------------------------------------------------------------------------|--------------------------|-----------------|-----------------------------------|--------------|-----------------------|
|                               |                                                                                                    | <b>Strongly disagree</b> | <b>Disagree</b> | <b>Neither agree nor disagree</b> | <b>Agree</b> | <b>Strongly agree</b> |
| <b>1</b>                      | <b>I am most afraid of COVID-19</b>                                                                |                          |                 |                                   |              |                       |
| <b>2</b>                      | <b>It makes me uncomfortable to think about COVID-19</b>                                           |                          |                 |                                   |              |                       |
| <b>3</b>                      | <b>My hands become clammy when I think about COVID-19</b>                                          |                          |                 |                                   |              |                       |
| <b>4</b>                      | <b>I'm afraid of losing my life because of COVID-19</b>                                            |                          |                 |                                   |              |                       |
| <b>5</b>                      | <b>When watching news and stories about COVID-19 on social media, I become nervous or anxious.</b> |                          |                 |                                   |              |                       |
| <b>6</b>                      | <b>I cannot sleep because I'm worrying about getting COVID-19</b>                                  |                          |                 |                                   |              |                       |
| <b>7</b>                      | <b>My heart races or palpitates when I think about getting COVID-19</b>                            |                          |                 |                                   |              |                       |
